# Supplementary material for: Favourable Functional Outcomes In Idiopathic Inflammatory Myositis- A Single Centre Experience Over 15 Years
Source: Research Square preprint supplement (doi:10.21203/rs.3.rs-598502/v1), 2021-06-21
Supplement: Supplementary file 1 [file a4f376560f794bfc083587cb.docx]

**Supplementary Table 1: Comparison with published IIM cohorts from different ethnicities**

| Characteristics | Our cohort | Porkodi et.al.,(2002)9 | Xio Ming Shu et.al., (2011)2 | Euromyositis registry (2017)27 | KJ chinniah et.al.,(2020)28 |
| --- | --- | --- | --- | --- | --- |
| n | 175 | 87 | 188 | 3067 | 104 |
| Median(IQR) age at onset | 38(27.5,48.5) | 25-35 | 43.8(15.8) | 49 (16) | 36.8(14.7) |
| Gender ratio( M:F) | 1:3.3 | 1:2.3 | 1:2.1 | 1:2.2 | 1:4.8 |
| Ethnicity | India | India | China | Caucasian | African and Indian |
| Median(IQR) disease duration at presentation (months) | 4(1,7) | NA | NA | 8(3,22) | 42(16,103) |
| Median(IQR) duration of follow up (months) | 26.5(6,72) | NA | 90 | 36 (18,72) | 33.5(13,100.8) |
| DM/PM/OM/ASS | 78/25/45/11 | 28/24/30 | 53/21/14.4/0 | 31/27/12/17 | 25/25/40 |
| Juvenile onset | 8.6 | 5 | 3.7 | 3 | 5.8 |
| **Calcinosis(%)**  Overall  JDM | 7.4  20 |  | 4.7 | 6  44 |  |
| Cancer (%) | 4 | 1.1 | 5.9 | 13 | 4.8 |
| MMT-8 | 61(49-69) | - | - | NA | - |
| Dysphagia (%) | 29.1 | 33.3 | 39.9 | 39 | 43.4 |
| Dysphonia (%) | 8 | 4.6 | 11 | NA | 19.2 |
| Respiratory muscle weakness(%) | 3.4 | 9.2 | - | - | - |
| ILD (%) | 13.7 | 9.2 | 48.9 | 30 | 27 |
| Cardiac (%) | 6.3 | 5.7 | 34 | 9 | 14.4 |
| ANA (%)n=157 | 56 | 67.3 | NA | NA | 70.4 |
| Jo-1/Non Jo-1/Mi-2/SRP (N=119) | 11.7/6.7/5/2.5 | NA | NA | NA | Done in a subset |
| Ro52/U1RNP/Pm-Scl/Ku (N= 137) | 37.1/30.5/5.7/4.9 | NA | NA | NA | Done in a  subset<50% |
| **Treatment (%)**  Methotrexate  Azathioprine  Mycophenolate  Cyclophosphamide  IV Ig  Rituximab  Median no. of immunosuppressants | 52  29.7  18.9  6.8  2.8  10.8  1(1,2) | 57.2  42.8  12.4  60  21.4 |  | 71  51  23  19  12  7  2(1-3) | 50  37.7  7.7  10.6  19.2  3.8 |
| **Course (%)**  Monocyclic/polycyclic/chronious continuous | 11.7/39.3/48.9 |  | 15.1/79.5/5.4 |  |  |
| MDI >0  Median | 58.7  1(1,2) |  | 71.8 |  |  |
| **HAQ (%)**  =0  >0  Median | 63.7  36.2  0(0,0.2) |  | 83.3  16.7 | 0.75(0.131.5) |  |
| Death (%) | 13.7 | 11.5 | 17 | NA | 7.7 |

DM- Dermatomycosis, PM - polymyositis, OM - overlap myositis, ASS- antisynthetase syndrome, JM- Juvenile Myositis, ILD- Interstitial Lung Disease, MMT8- Manual Muscle Testing, MITAX- myositis intention to treat activity index, HAQ-Health Assessment questionnaire; MDI- Myositis Damage Index; MRS-Muscle Ranking Score

**Supplementary Table 2 : Complications**

| **Complication (n)** | | | |
| --- | --- | --- | --- |
| LRI  Pyelonephritis  Cellulitis  Abscess  TB  Fungal ball  Zoster | 7  2  2  1  6  1  3 | CAD  DM  HTN  Osteoporosis  AVN  Cataract  Thrombosis - venous  Chronic liver disease  GI bleed | 4  4  5  2  2  4  3  2  1 |
